# Supplementary material for: PGG.MHC: toward understanding the diversity of major histocompatibility complexes in human populations
Source: PubMed Central journal article supplement — Nucleic Acids Res. 2022 Nov 2;51(D1):D1102–8. doi: 10.1093/nar/gkac997 (PMC9825418; doi:10.1093/nar/gkac997), 2022-11-02
Supplement: gkac997_supplemental_file.pdf [file gkac997_supplemental_file.pdf]

Supplemental Information for  
PGG.MHC: towards understanding the diversity of major histocompatibility complexes in global  
populations

This PDF file contains:  
Supplementary Table S1  
Supplementary Table S2  
Supplementary Table S3  
Supplementary Figure S1

Table S1. Detailed information about PGG.MHC data sources

| Data source                        | Abbreviation | Data type  | Sample size | Coverage      | Genomic coordinate |
|------------------------------------|--------------|------------|-------------|---------------|--------------------|
| The 1000 Genomes Project           | KGP          | WGS        | 1,453       | 35.69         | GRCh38             |
| The Human Genome Diversity Project | HGDP         | WGS        | 761         | 36.75         | GRCh38             |
| Simons Genome Diversity Project    | SGDP         | WGS        | 279         | 42.32         | GRCh37             |
| HuaBiao                            | HuaBiao      | WES        | 5,002       | 73.7          | GRCh38             |
| PGG                                | PGG          | WGS        | 3,561       | ~23.03-35.65  | GRCh37/<br>GRCh38  |
|                                    |              | Genotyping | 42,198      | Not available | GRCh37             |

Table S2. HLA typing results and benchmark typing results for KGP samples

| Sample ID | Source     | HLA-A_1 | HLA-A_2 | HLA-B_1 | HLA-B_2 | HLA-C_1 | HLA-C_2 | HLA-DQB1_1 | HLA-DQB1_2 | HLA-DRB1_1 | HLA-DRB1_2 |
|-----------|------------|---------|---------|---------|---------|---------|---------|------------|------------|------------|------------|
| NA18528   | Genotyping | A*11:01 | A*31:01 | B*13:01 | B*35:03 | C*03:04 | C*06:02 | DQB1*05:02 | DQB1*05:03 | DRB1*14:01 | DRB1*14:04 |
|           | WGS        | A*11:01 | A*31:01 | B*13:01 | B*35:03 | C*03:04 | C*06:02 | DQB1*05:02 | DQB1*05:03 | DRB1*14:01 | DRB1*14:04 |
|           | WES        | A*11:01 | A*31:01 | B*13:01 | B*35:03 | C*03:04 | C*06:02 | DQB1*05:02 | DQB1*05:02 | DRB1*14:01 | DRB1*14:54 |
|           | Benchmark  | A*11:01 | A*31:01 | B*13:01 | B*35:03 | C*03:04 | C*06:02 | DQB1*05:02 | DQB1*05:03 | DRB1*14:04 | DRB1*14:04 |
| NA18538   | Genotyping | A*24:02 | A*33:03 | B*15:01 | B*58:01 | C*03:02 | C*04:01 | DQB1*03:02 | DQB1*06:09 | DRB1*04:06 | DRB1*13:02 |
|           | WGS        | A*24:02 | A*33:03 | B*15:01 | B*58:01 | C*03:02 | C*04:01 | DQB1*03:02 | DQB1*06:09 | DRB1*04:06 | DRB1*13:02 |
|           | WES        | A*24:02 | A*33:03 | B*15:01 | B*58:01 | C*03:02 | C*04:01 | DQB1*03:02 | DQB1*06:09 | DRB1*04:06 | DRB1*13:02 |
|           | Benchmark  | A*24:02 | A*33:03 | B*15:01 | B*58:01 | C*03:02 | C*04:01 | DQB1*03:02 | DQB1*06:09 | DRB1*04:06 | DRB1*13:02 |
| NA18539   | Genotyping | A*02:01 | A*26:01 | B*39:01 | B*54:01 | C*01:02 | C*07:02 | DQB1*04:01 | DQB1*06:01 | DRB1*04:05 | DRB1*08:03 |
|           | WGS        | A*02:01 | A*26:01 | B*39:01 | B*54:01 | C*01:02 | C*07:02 | DQB1*04:01 | DQB1*06:01 | DRB1*04:05 | DRB1*08:03 |
|           | WES        | A*02:01 | A*26:01 | B*39:01 | B*54:01 | C*01:02 | C*07:02 | DQB1*04:01 | DQB1*06:01 | DRB1*04:05 | DRB1*08:03 |
|           | Benchmark  | A*02:01 | A*26:01 | B*39:01 | B*54:01 | C*01:02 | C*07:02 | DQB1*04:01 | DQB1*06:01 | DRB1*04:05 | DRB1*08:03 |
| NA18541   | Genotyping | A*11:01 | A*30:04 | B*14:01 | B*51:01 | C*08:02 | C*14:02 | DQB1*04:02 | DQB1*05:02 | DRB1*04:04 | DRB1*16:02 |
|           | WGS        | A*11:01 | A*30:04 | B*14:01 | B*51:01 | C*08:02 | C*14:02 | DQB1*05:02 | DQB1*04:02 | DRB1*04:04 | DRB1*16:02 |
|           | WES        | A*11:01 | A*30:04 | B*14:01 | B*51:01 | C*08:02 | C*14:02 | DQB1*04:02 | DQB1*05:02 | DRB1*04:04 | DRB1*16:02 |
|           | Benchmark  | A*11:01 | A*30:04 | B*14:01 | B*51:01 | C*08:02 | C*14:02 | DQB1*05:02 | DQB1*04:02 | DRB1*04:04 | DRB1*16:02 |
| HG00403   | Genotyping | A*02:01 | A*31:01 | B*13:01 | B*35:01 | C*03:03 | C*03:04 | DQB1*03:01 | DQB1*06:02 | DRB1*12:02 | DRB1*15:01 |
|           | WGS        | A*02:01 | A*31:01 | B*13:01 | B*35:01 | C*03:03 | C*03:04 | DQB1*03:01 | DQB1*06:02 | DRB1*12:02 | DRB1*15:01 |
|           | WES        | A*02:01 | A*31:01 | B*13:01 | B*35:01 | C*03:03 | C*03:04 | DQB1*03:01 | DQB1*06:02 | DRB1*15:01 | DRB1*15:01 |
|           | Benchmark  | A*02:01 | A*31:01 | B*13:01 | B*35:01 | C*03:03 | C*03:04 | DQB1*03:01 | DQB1*06:02 | DRB1*12:02 | DRB1*15:01 |
| HG00559   | Genotyping | A*24:02 | A*33:03 | B*55:02 | B*58:01 | C*01:02 | C*03:02 | DQB1*02:01 | DQB1*03:03 | DRB1*03:01 | DRB1*09:01 |
|           | WGS        | A*24:02 | A*33:03 | B*55:02 | B*58:01 | C*01:02 | C*03:02 | DQB1*02:01 | DQB1*03:03 | DRB1*03:01 | DRB1*09:01 |
|           | WES        | A*24:02 | A*33:03 | B*55:02 | B*58:01 | C*01:02 | C*03:02 | DQB1*02:01 | DQB1*03:03 | DRB1*03:01 | DRB1*09:01 |
|           | Benchmark  | A*24:02 | A*33:03 | B*55:02 | B*58:01 | C*01:02 | C*03:02 | DQB1*02:01 | DQB1*03:03 | DRB1*03:01 | DRB1*09:01 |
| HG00565   | Genotyping | A*02:03 | A*33:03 | B*40:01 | B*40:01 | C*03:04 | C*07:02 | DQB1*05:02 | DQB1*05:02 | DRB1*16:02 | DRB1*16:02 |
|           | WGS        | A*02:03 | A*33:03 | B*40:01 | B*40:01 | C*03:04 | C*07:02 | DQB1*05:02 | DQB1*05:02 | DRB1*16:02 | DRB1*16:02 |
|           | WES        | A*02:03 | A*33:03 | B*40:01 | B*40:01 | C*03:04 | C*07:02 | DQB1*03:22 | DQB1*05:02 | DRB1*16:01 | DRB1*16:02 |
|           | Benchmark  | A*02:03 | A*33:03 | B*40:01 | B*40:01 | 03:04   | C*07:02 | DQB1*05:02 | DQB1*05:02 | DRB1*16:02 | DRB1*16:02 |
| HG00566   | Genotyping | A*02:07 | A*24:02 | B*46:01 | B*58:01 | C*01:02 | C*03:02 | DQB1*02:01 | DQB1*03:03 | DRB1*03:01 | DRB1*09:01 |
|           | WGS        | A*02:07 | A*24:02 | B*46:01 | B*58:01 | C*01:02 | C*03:02 | DQB1*02:01 | DQB1*03:03 | DRB1*03:01 | DRB1*09:01 |
|           | WES        | A*02:07 | A*24:02 | B*46:01 | B*58:01 | C*01:02 | C*03:02 | DQB1*02:01 | DQB1*03:03 | DRB1*03:01 | DRB1*09:01 |
|           | Benchmark  | A*02:07 | A*24:02 | B*46:01 | B*58:01 | C*01:02 | C*03:02 | DQB1*02:01 | DQB1*03:03 | DRB1*03:01 | DRB1*09:01 |

Table S3. Imputation reference panels in *PGG.MHC*

| Reference panel | Sample region               | Sample size | Number of classical HLA alleles | Number of SNPs in HLA region |
|-----------------|-----------------------------|-------------|---------------------------------|------------------------------|
| 1000G_REF       | AFR, AMR, EAS, EUR, and SAS | 2,504       | 465                             | 5,067                        |
| Pan-Asian panel | EAS and SAS                 | 530         | 273                             | 6,173                        |
| Korean panel    | EAS                         | 413         | 251                             | 5,858                        |
| HuaBiao_REF     | EAS                         | 5,002       | 485                             | 4,393                        |
| PGG_REF         | EAS                         | 1,835       | 981                             | 13,350                       |

AFR (Africa), AMR (America), EAS (East Asia), SAS (South Asia), EUR (Europe)

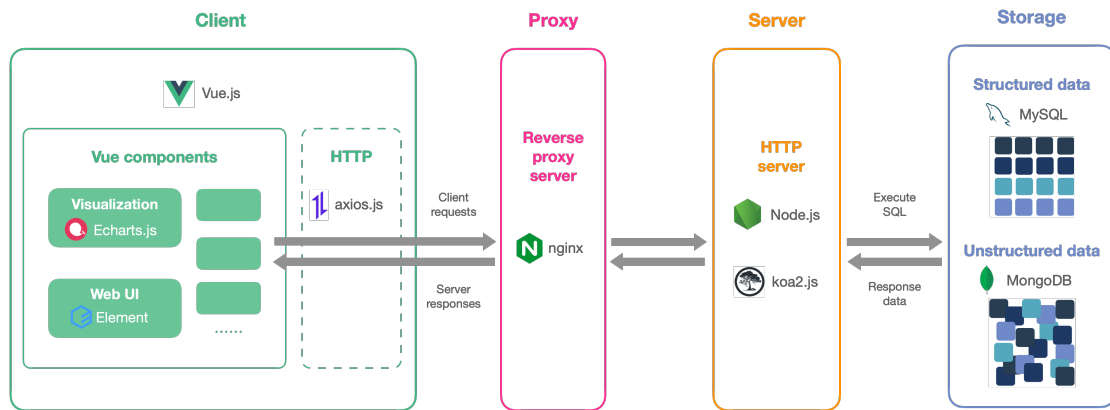

Figure S1. Database architecture
